# Supplementary material for: Circulating Tumor DNA Reflects Uveal Melanoma Responses to Protein Kinase C Inhibition
Source: MDPI journal article supplement (doi:10.3390/cancers13071740), 2021-04-06
Supplement: s1 [file s1]

# Supplementary Materials: Circulating Tumor DNA Reflects Uveal Melanoma Responses to Protein Kinase C Inhibition

John J. Park, Russell J. Diefenbach, Natalie Byrne, Georgina V. Long, Richard A. Scolyer, Elin S. Gray, Matteo S. Carlino and Helen Rizos

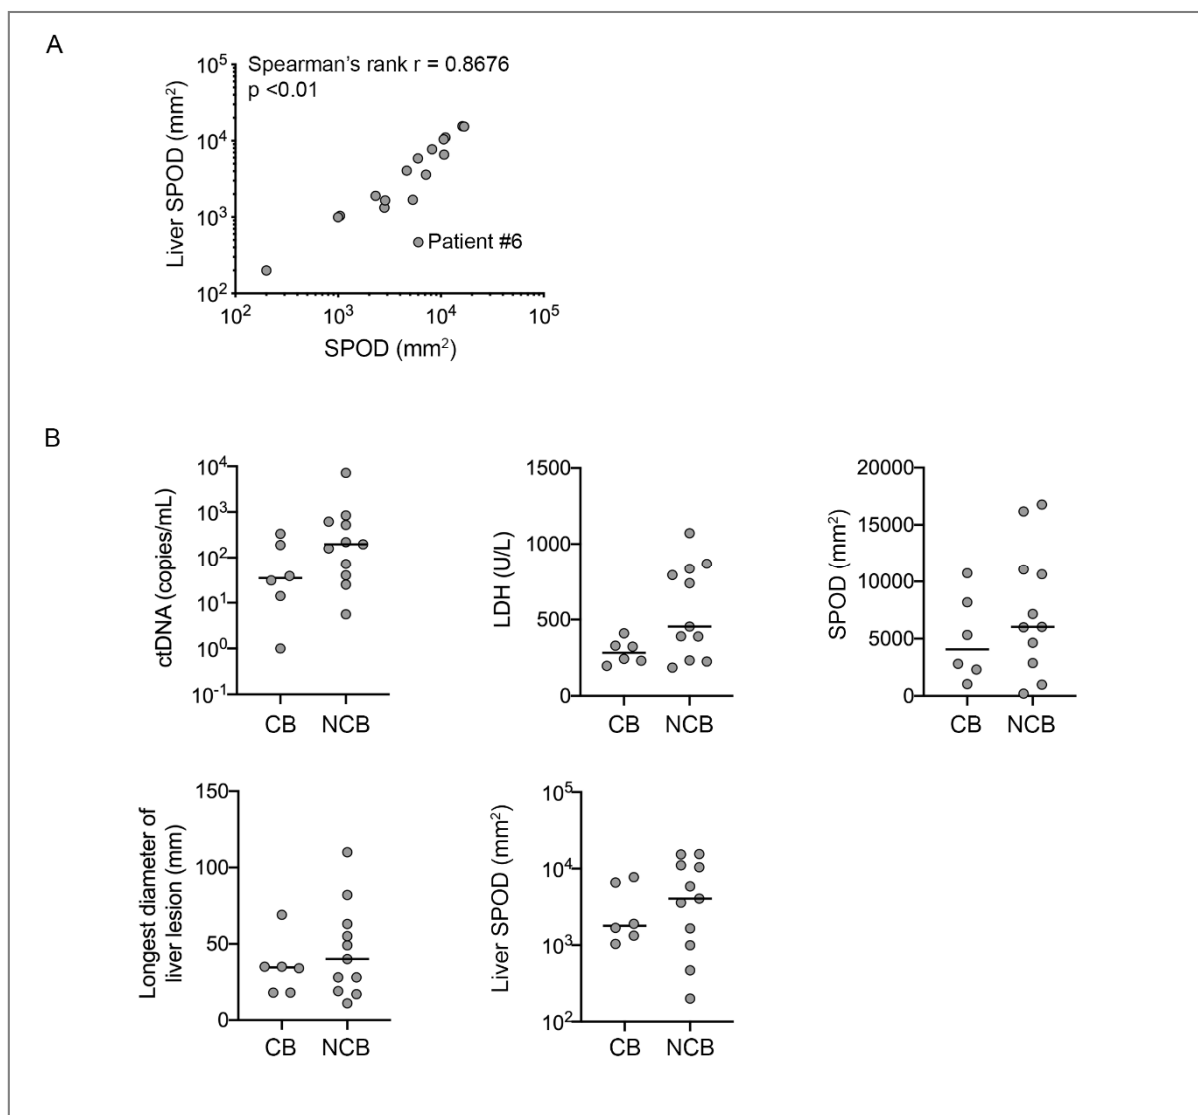

**Figure S1.** Relationship between PKC inhibitor-based response and ctDNA levels, LDH and disease burden. **(A)** Spearman's rank correlation between SPOD (mm<sup>2</sup>) and liver SPOD (mm<sup>2</sup>) ( $p < 0.01$ ). Patient #6 had multiple disease sites, and a relatively low level of liver disease. **(B)** Baseline ctDNA levels, LDH, SPOD, longest liver lesion, and liver SPOD were consistently, but not significantly lower, in clinical benefit (CB) (PR and SD > 6 months) compared to no clinical benefit (NCB) (PD and SD < 6 months) UM patients. Graphs show ctDNA+1. Kruskal-Wallis test with Dunn's multiple comparison test was used to compare untransformed ctDNA copies in clinical benefit group and no clinical benefit group.

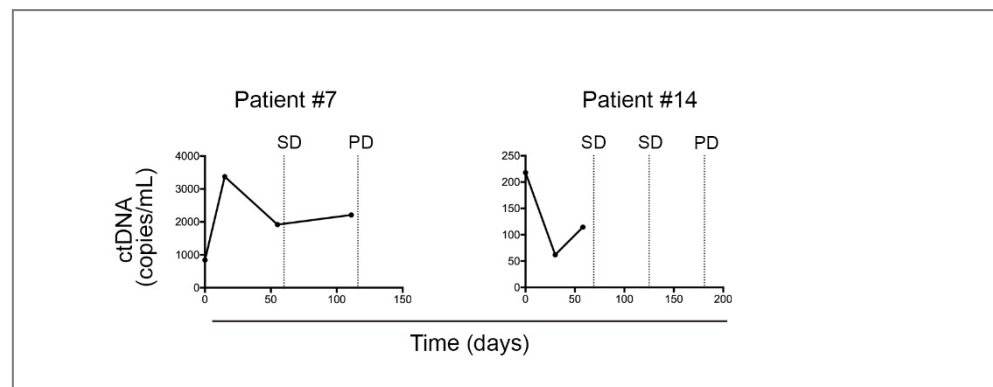

**Figure S2.** Longitudinal monitoring of ctDNA in patients treated with PKi in metastatic UM. ctDNA levels were collected longitudinally during treatment and correlated to CT imaging during baseline, whilst on treatment and on progression. Longitudinal ctDNA monitoring is shown for no clinical benefit patients #7 and #14. SD—stable disease, PD—progressive disease.

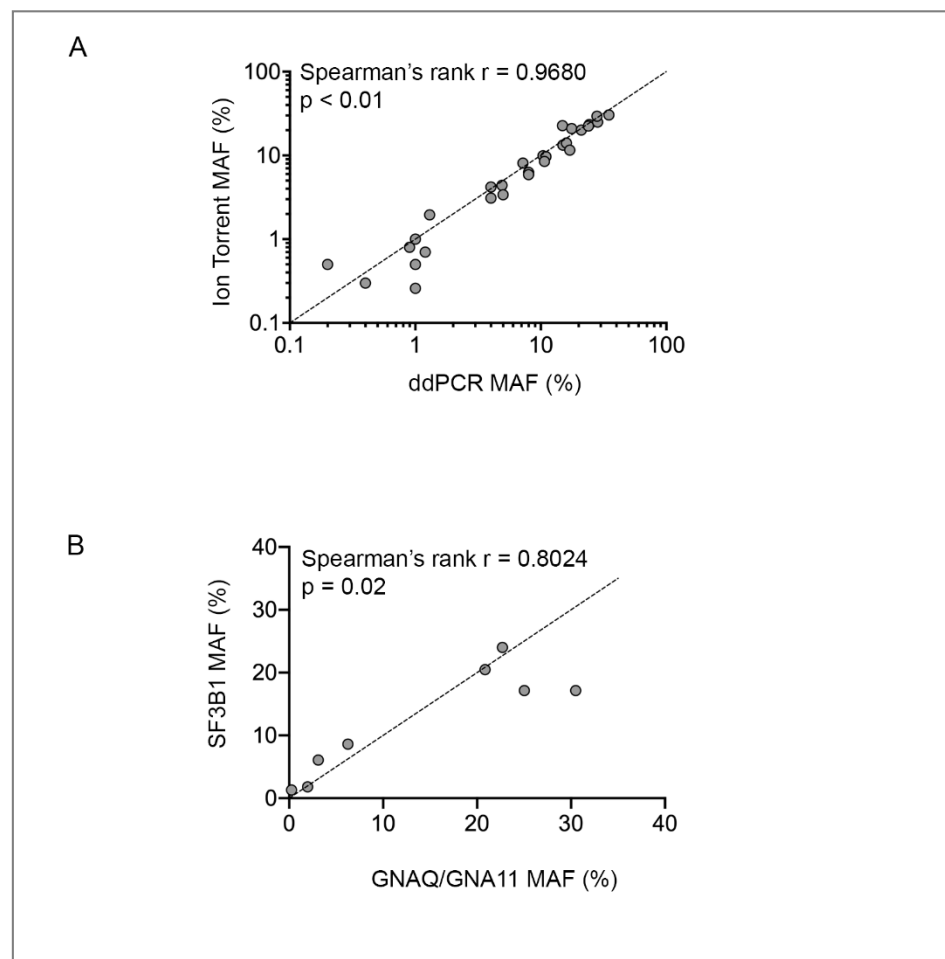

**Figure S3.** Significant correlation in mutant allele frequency determined by ddPCR and targeted Ion Torrent NGS. (A) Spearman's rank correlation between mutant allele frequency (MAF) of ddPCR and Ion Torrent NGS. Correlation was performed on untransformed mutant allele frequency values. (B) Spearman's rank correlation between mutant allele frequency (MAF) of Ion Torrent NGS comparing SF3B1 mutation and GNAQ/GNA11. Dashed lines are  $y = x$ .

Table S1. Patient and response to therapy details.

| Patient ID | Age | Sex | ECOG PS | Mutation                 | Best Response | SPOD (mm <sup>2</sup> ) | Liver SPOD (mm <sup>2</sup> ) | Longest Liver Lesion (mm) | Baseline LDH (U/L) | Baseline ctDNA (Copies/mL) | Sites of Disease               | Treatment    | Dose of PKCi          | Primary Tumour Type | PFS (Months) |
|------------|-----|-----|---------|--------------------------|---------------|-------------------------|-------------------------------|---------------------------|--------------------|----------------------------|--------------------------------|--------------|-----------------------|---------------------|--------------|
| 1          | 56  | M   | 0       | GNA11 <sup>Q209L</sup>   | SD ≥ 6 mths   | 8178                    | 7741                          | 34                        | 323                | 37.5                       | Liver, bowel                   | PKCi         | 300mg OD              | Choroidal           | 7.4          |
| 2          | 71  | M   | 0       | GNA11 <sup>Q209L</sup>   | PR            | 2316                    | 1896                          | 35                        | 231                | 30                         | Liver, retroperitoneal         | PKCi         | 300mg BD              | Unknown             | 3.7          |
| 3          | 55  | M   | 0       | GNA11 <sup>Q209L</sup>   | SD ≥ 6 mths   | 2814                    | 1326                          | 18                        | 243                | 13                         | Liver, lung, bone, omentum     | PKCi         | 300mg OD              | Choroidal           | 9.6          |
| 4          | 69  | F   | 0       | GNAQ <sup>R183H</sup>    | SD ≥ 6 mths   | 10726                   | 6604                          | 69                        | 411                | 187.5                      | Liver, lung, LN                | PKCi         | 400mg BD              | Iris                | 9.3          |
| 5          | 47  | M   | 0       | GNA11 <sup>Q209L</sup>   | SD ≥ 6 mths   | 1041                    | 1041                          | 18                        | 197                | 0                          | Liver                          | PKCi         | 300mg BD              | Unknown             | 13.1         |
| 6          | 51  | M   | 0       | GNAQ <sup>Q209P</sup>    | PD            | 6022                    | 469                           | 17                        | 1072               | 7172                       | Liver, lung, adrenal, bone, LN | PKCi         | 500mg OD              | Choroidal           | 1.9          |
| 7          | 45  | M   | 0       | GNA11 <sup>Q209L</sup>   | SD < 6 mths   | 11063                   | 11063                         | 63                        | 793                | 842                        | Liver, bone                    | PKCi         | 300mg OD              | Choroidal           | 3.6          |
| 8          | 54  | F   | 0       | GNAQ <sup>Q209P</sup>    | PD            | 5986                    | 5881                          | 40                        | 390                | 157.7                      | Liver, lung                    | PKCi         | 300mg BD              | Unknown             | 1.7          |
| 9          | 57  | F   | 0       | GNA11 <sup>Q209L</sup>   | SD < 6 mths   | 200                     | 200                           | 11                        | 186                | 24                         | Liver                          | PKCi         | 300mg BD              | Unknown             | 3.7          |
| 10         | 67  | F   | 0       | CYSLTR2 <sup>L129Q</sup> | PD            | 4635                    | 4072                          | 49                        | 233                | 196.2                      | Liver, bone, spleen            | PKCi         | 300mg BD              | Choroidal           | 1.9          |
| 11         | 52  | F   | 0       | GNA11 <sup>Q209L</sup>   | SD < 6 mths   | 16175                   | 15525                         | 55                        | 739                | 614                        | Liver, lung                    | PKCi         | 400mg BD              | Choroidal           | 3.8          |
| 12         | 67  | F   | 1       | GNA11 <sup>Q209L</sup>   | PD            | 2871                    | 1653                          | 19                        | 389                | 39                         | Liver, lung, bone, LN          | PKCi + HDM2i | 300mg OD              | Choroidal           | 1.7          |
| 13         | 67  | F   | 0       | GNAQ <sup>Q209P</sup>    | SD < 6 mths   | 997                     | 997                           | 28                        | 225                | 15.4                       | Liver                          | PKCi + HDM2i | 100mg BD              | Choroidal           | 5.4          |
| 14         | 55  | M   | 1       | GNAQ <sup>Q209P</sup>    | SD < 6 mths   | 16782                   | 15366                         | 82                        | 454                | 218                        | Liver, lung, LN                | PKCi + HDM2i | 200mg BD              | Choroidal           | 3.8          |
| 15         | 73  | M   | 1       | GNAQ <sup>Q209P</sup>    | SD < 6 mths   | 7154                    | 3595                          | 28                        | 835                | 521                        | Liver, lung, LN, spleen        | PKCi + HDM2i | 300mg BD              | Choroidal           | 3.8          |
| 16         | 55  | M   | 1       | GNAQ <sup>Q209P</sup>    | PR            | 5330                    | 1682                          | 35                        | 329                | 333                        | Liver, lung bone, LN, pancreas | PKCi + HDM2i | 300mg BD              | Choroidal           | 3.7          |
| 17         | 67  | M   | 0       | GNAQ <sup>R183Q</sup>    | SD < 6 mths   | 10628                   | 10460                         | 110                       | 869                | 71                         | Liver, spleen, bone            | PKCi + HDM2i | 400mg BD <sup>a</sup> | Choroidal           | 3.9          |

Abbreviations: LDH, lactate dehydrogenase; PR, partial response; SD, stable disease; PD, progressive disease; SPOD, sum of the product of bi-dimensional diameters; PFS, progression free survival; LN, lymph node; U/L, units/litre; PKCi, protein kinase C inhibitor (LXS196); HDM2i, human double minute 2 inhibitor (HDM201); ECOG PS, Eastern Cooperative Oncology Group performance status; mths, months; OD, once daily; BD, twice daily. <sup>a</sup>Patient #17 had a 3 day does interruption during the PRE-EDT sample period and was on treatment at the time of EDT sample collection.
